# Supplementary material for: Photocurrent generation by a photosystem I-NiO photocathode for a p-type biophotovoltaic tandem cell
Source: Royal Society of Chemistry journal article supplement (doi:10.1039/d0ra01793k), 2020-01-01
Supplement: d0ra01793k1.pdf [file d0ra01793k1.pdf]

## Supporting Information

# Photocurrent Generation by Photosystem I–NiO Photocathode for *p*-Type Biophotovoltaic and Tandem Cell

Yuya Takekuma<sup>a</sup>, Nobuhiro Ikeda<sup>a</sup>, Keisuke Kawakami<sup>b</sup>, Nobuo Kamiya<sup>c</sup>, Mamoru Nango<sup>c</sup> and Morio Nagata<sup>a\*</sup>

*<sup>a</sup>Department of Industrial Chemistry, Graduate School of Engineering, Tokyo University of Science, 12-1 Ichigaya-funagawara, Shinjuku-ku, Tokyo 162-0826, Japan*

*<sup>b</sup>Research Center for Artificial Photosynthesis (ReCAP), Osaka City University, 3-3-138 Sugimoto, Sumiyoshi-ku, Osaka 558-8585, Japan*

*<sup>c</sup>The OCU Advanced Research Institute for Natural Science & Technology (OCARINA), Osaka City University, 3-3-138 Sugimoto, Sumiyoshi-ku, Osaka 558-8585, Japan*

### Corresponding author:

Morio Nagata

nagata@ci.tus.ac.jp

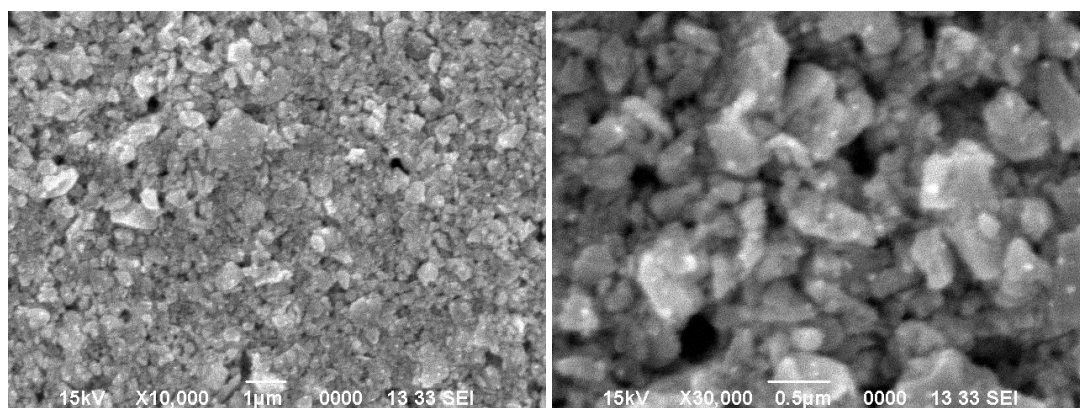

Figure S1. SEM images of NiO electrode.

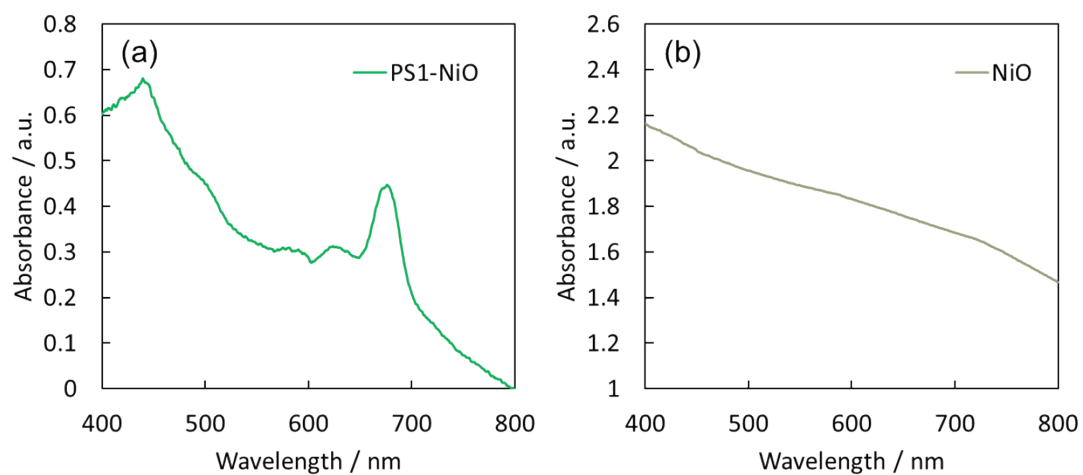

Figure S2. Absorption spectrum of PS1-adsorbed NiO electrode (a). The spectrum was corrected from scattering and intrinsic absorption by subtracting bare NiO film (b).

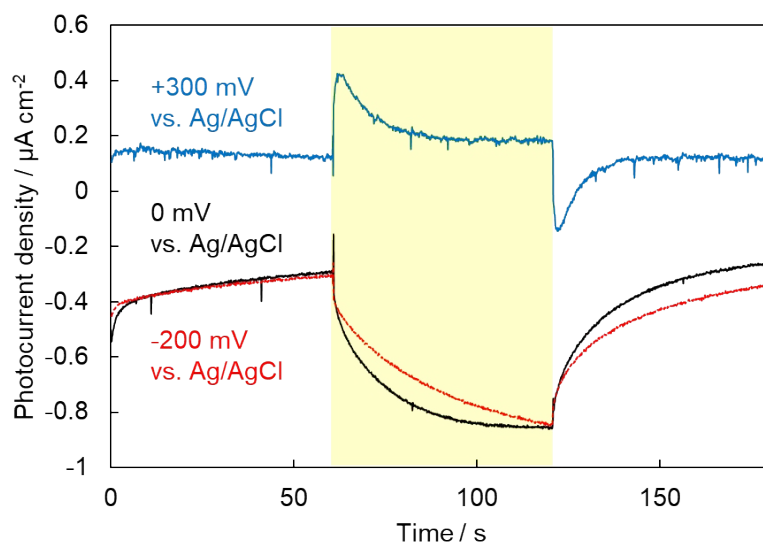

Figure S3. Photoelectrochemical experiment of PS1-NiO without  $\text{MV}^{2+}$  (green solid) at 0 mV, -200 mV, and +300 mV vs. Ag/AgCl in 0.1 M phosphate aqueous buffer (pH 7) solution containing 0.1 M  $\text{NaClO}_4$ . The experiment was done under illumination with AM 1.5 filter and 420 nm long-pass filter.
